# Supplementary material for: A Toxoplasma Prolyl Hydroxylase Mediates Oxygen Stress Responses by Regulating Translation Elongation
Source: PubMed Central journal article supplement (PMC6437050; doi:10.1128/mbio.00234-19), 2019-03-26
Supplement: mBio.00234-19-st001.pdf [file mBio.00234-19-st001.pdf]

## Supplemental Table S1

List of Antibodies:

| Target protein                   | Source | Company                                               | Catalog # |
|----------------------------------|--------|-------------------------------------------------------|-----------|
| <b>eIF2<math>\alpha</math></b>   | Rabbit | Gift from Dr. William J. Sullivan, Indiana University |           |
| <b>P-eIF2<math>\alpha</math></b> | Rabbit | Gift from Dr. William J. Sullivan, Indiana University |           |
| <b>eEF2</b>                      | Rabbit | Kerafast                                              | ED7002    |
| <b>P-eEF2</b>                    | Rabbit | Cell Signaling                                        | #2331     |
| <b>HA</b>                        | Rabbit | Cell Signaling                                        | #3724     |
| <b>Histone H3</b>                | Mouse  | Active Motif                                          | #39763    |
| <b>MIC2</b>                      | Mouse  | Gift from Dr. Vern Carruthers, University of Michigan |           |
| <b>SAG1</b>                      | Mouse  | GenWay Biotech                                        | #44A329   |
| <b>SAG1</b>                      | Rabbit | Gift from Dr. John Boothroyd, Stanford University     |           |
| <b>Puromycin</b>                 | Mouse  | Sigma-Aldrich                                         | MABE343   |

List of Primers:

| Target                                    | Sequence                                                                                        |
|-------------------------------------------|-------------------------------------------------------------------------------------------------|
| <b><i>B1</i></b>                          | 5'-GGAAGTGCATCCGTTTCATGAG-3'<br>5'-TCTTTAAAGCGTTCGTGGTC-3'                                      |
| <b><i>mic2</i></b>                        | 5'-GGGGTATGTGCTGTTGACG-3'<br>5'-GTGGCATTTCGCAAGAC-3'                                            |
| <b><i>phyB</i></b>                        | 5'-TACTTCCAATCCAATTTAGCCCTGTATTGTCGTCCTTTTG-3'<br>5'-TCCTCCACTTCCAATTTAGCAACGTCGTCCCCAGGACCG-3' |
| <b><i>rop18</i></b>                       | 5'-GCAAACGCATCCTGGCGCAC-3'<br>5'-CCGAGTTGCCACGCGTCAGT-3'                                        |
| <b><i><math>\alpha</math>-tubulin</i></b> | 5'-ATGCCCTCTGACAAGACCATTGGA-3'<br>5'-GGCTCAAATCCAAGAAGACGCAT-3'                                 |
